# Supplementary material for: Does plastic type matter? Insights into non-indigenous marine larvae recruitment under controlled conditions
Source: PeerJ. 2022 Dec 19;10:e14549. doi: 10.7717/peerj.14549 (PMC9774007; doi:10.7717/peerj.14549)
Supplement: Supplemental Information 1 [file peerj-10-14549-s001.xlsx]

## Sheet: Sheet1
Substrate	Specie	Count	Microsm
LLDPE	S. caraniferus	15.07	1
PLA	S. caraniferus	33.79	1
NYLON	S. caraniferus	34.7	1
GLASS	S. caraniferus	16.44	1
LLDPE	S. caraniferus	18.02	2
PLA	S. caraniferus	36.63	2
NYLON	S. caraniferus	37.21	2
GLASS	S. caraniferus	8.14	2
LLDPE	S. caraniferus	13.55	3
PLA	S. caraniferus	41.94	3
NYLON	S. caraniferus	36.77	3
GLASS	S. caraniferus	7.74	3
LLDPE	C. savignyi	13.89	1
PLA	C. savignyi	16.67	1
NYLON	C. savignyi	41.67	1
GLASS	C. savignyi	27.78	1
LLDPE	C. savignyi	14.93	2
PLA	C. savignyi	11.94	2
NYLON	C. savignyi	46.27	2
GLASS	C. savignyi	26.87	2
LLDPE	C. savignyi	5.41	3
PLA	C. savignyi	9.46	3
NYLON	C. savignyi	44.59	3
GLASS	C. savignyi	40.54	3
LLDPE	C. gigas	28.85	1
PLA	C. gigas	38.05	1
NYLON	C. gigas	16.41	1
GLASS	C. gigas	16.69	1
LLDPE	C. gigas	31.05	2
PLA	C. gigas	16.82	2
NYLON	C. gigas	28.92	2
GLASS	C. gigas	23.21	2
LLDPE	C. gigas	35.43	3
PLA	C. gigas	10.43	3
NYLON	C. gigas	19.43	3
GLASS	C. gigas	34.71	3
LLDPE	M. galloprovincialis	13.16	1
PLA	M. galloprovincialis	39.47	1
NYLON	M. galloprovincialis	42.76	1
GLASS	M. galloprovincialis	4.61	1
LLDPE	M. galloprovincialis	10.06	2
PLA	M. galloprovincialis	19.5	2
NYLON	M. galloprovincialis	27.04	2
GLASS	M. galloprovincialis	43.4	2
LLDPE	M. galloprovincialis	13.86	3
PLA	M. galloprovincialis	33.66	3
NYLON	M. galloprovincialis	28.71	3
GLASS	M. galloprovincialis	23.76	3
